# Supplementary material
Source: Springer Nature journal article supplement (https://www.springermedizin.de/resource/supplementary/12879_2012_1901_MOESM2_ESM.pdf/9443968)

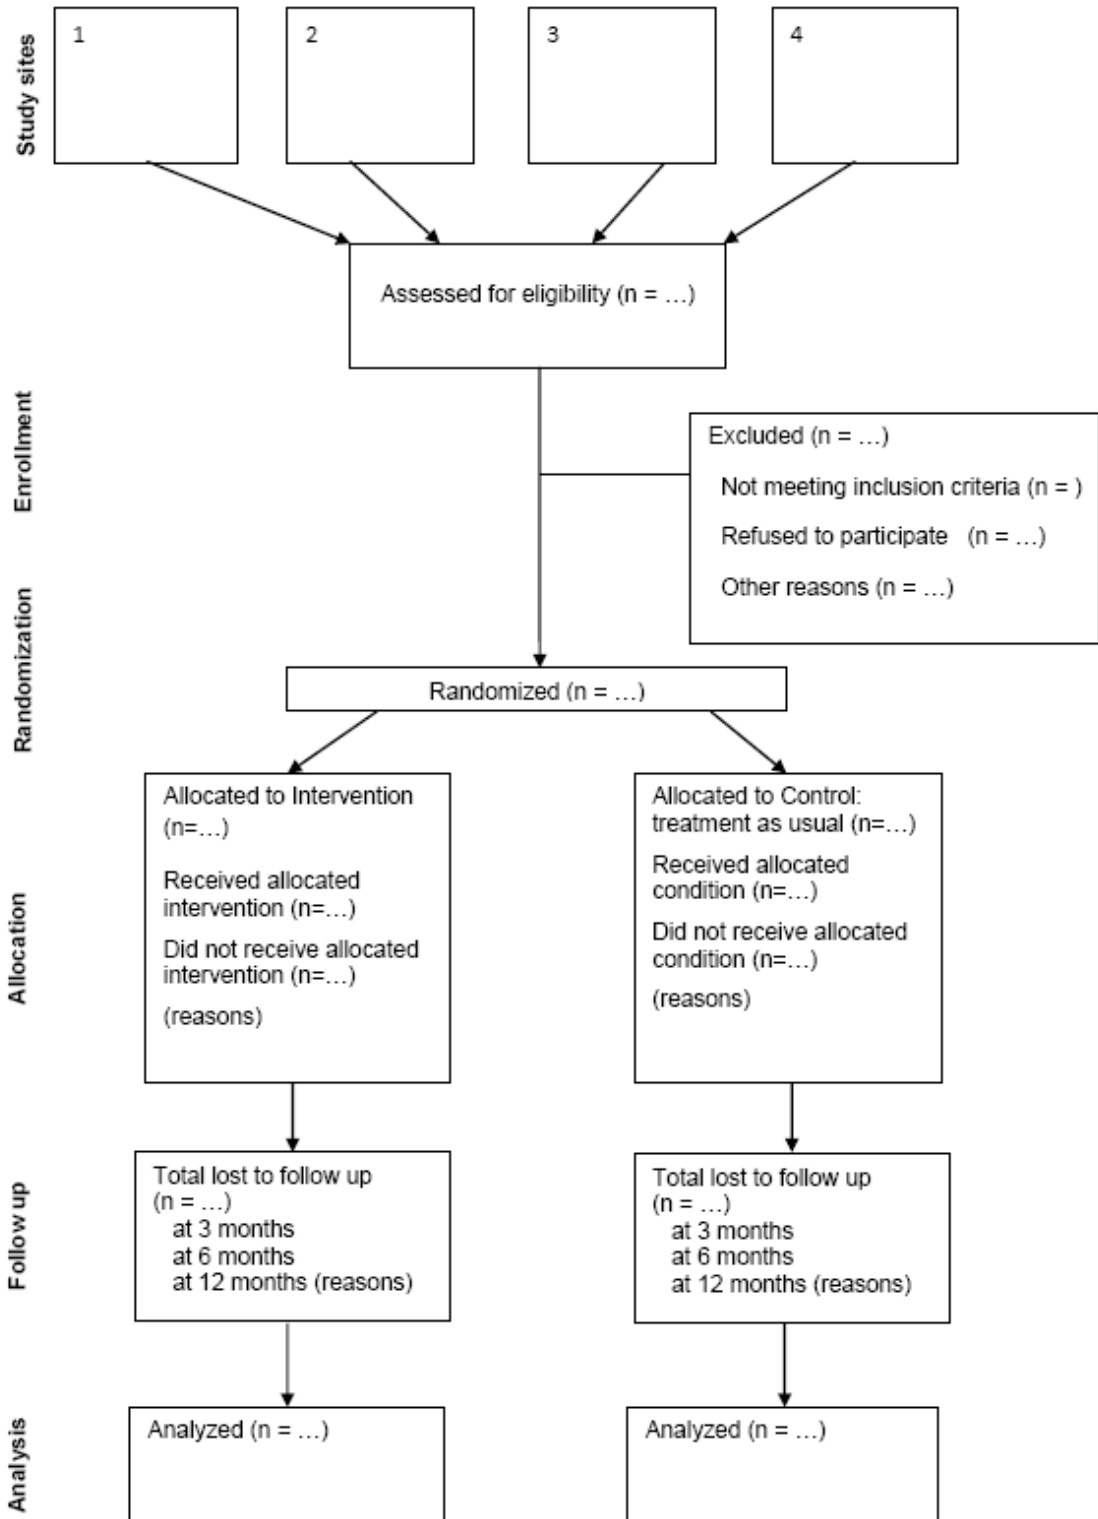

Supplement: MOESM2 [file 9443968]
